# Supplementary material
Source: publisher site journal article supplement (https://www.dovepress.com/article/534605)
Supplement: Supplementary file 1 [file 534605%20supplementary%20material.doc]

Supplementary Method

**Tandem mass tag (TMT) Analysis**

The peptide mixture was loaded onto the C18-reversed phase analytical column (Thermo Fisher Scientific，Acclaim PepMap RSLC 50um X 15cm, nano viper,P/N164943) in buffer A (0.1% Formic acid) and separated with a linear gradient of buffer B (80% acetonitrile and 0.1% Formic acid) at a flow rate of 300 nl/min. The linear gradient was as follows: 6% buffer B for 3 min, 6-28% buffer B for 42 min, 28-38% buffer B for 5min，38-100% buffer B for 5 min , hold in 100% buffer B for 5 min.

LC-MS/MS analysis was performed on a Q Exactive HF-X mass spectrometer (Thermo Fisher Scientific，Acclaim PepMap RSLC 50um X 15cm, nano viper,P/N16494) that was coupled to Easy nLC (Thermo Fisher Scientific) for 60 min.The mass spectrometer was operated in positive ion mode. MS data was acquired using a data-dependent top10 method dynamically choosing the most abundant precursor ions from the survey scan (350–1800 m/z) for HCD fragmentation. Survey scans were acquired at a resolution of 60000 at m/z 200 with an AGC target of 3e6 and a maxIT of 50 ms. MS2 scans were acquired at a resolution of 15000 for HCD spectra at m/z 200 with an AGC target of 2e5 and a maxIT of 45 ms, and isolation width was 2 m/z. Only ions with a charge state between 2-6 and a minimum intensity of 2e3 were selected for fragmentation. Dynamic exclusion for selected ions was 30s. Normalized collision energy was 30 eV.

Supplementary Table 1. Sequence for sgRNA.

| No. of sgRNA | Sequence of sgRNA |
| --- | --- |
| PCA09187 | ATCTTATGAGATTGTTGTGA |
| PCA09188 | ATGACAGGGGTTCAATAAAT |
| PCA09189 | GAGTGGACAATACAGAGATC |

Supplementary Table 2. Sequence of primers for qRT-PCR.

Gene Forward primer Reverse primer

IL1B GAGCTCGCCAGTGAAATGAT CCTGAAGCCCTTGCTGTAGT

TNF AGAACTCACTGGGGCCTACA GCTCCGTGTCTCAAGGAAGT

CXCL9 GATTGGTGCCCAGTTAGCCT CCACCGGACAGCACTCTAAA

IL10 TTCCAGTGTCTCGGAGGGAT GCTGGCCACAGCTTTCAAGA

ARG1 GTCTGTGGGAAAAGCAAGCG CACCAGGCTGATTCTTCCGT

CCL22 CCTACTCTGATGACCGTGGC GAGAGTTGGCACAGGCTTCT

Supplementary Table 3. Chi-square analysis of association between ITGB7 gene expression and clinical characteristics of patients in TCGA PAAD data.

|  | ITGB7 gene | expression | Total（81） | P-value |
| --- | --- | --- | --- | --- |
|  | Low（40） | High（41） |
| Age |  | | | |
| ＜60 | 12 | 16 | 28 | 0.4852 |
| ≥60 | 28 | 25 | 53 |
| Gender |  |  |  |  |
| Female | 16 | 23 | 39 | 0.1843 |
| Male | 24 | 18 | 42 |
| T classification |  |  |  |  |
| T1+T2 | 6 | 5 | 11 | 0.756 |
| T3+T4 | 34 | 36 | 70 |
| N clssification |  |  |  |  |
| N0 | 13 | 10 | 23 | 0.467 |
| N1+N2 | 27 | 31 | 58 |
| M classification |  |  |  |  |
| M0 | 36 | 40 | 76 | 0.2012 |
| M1 | 4 | 1 | 5 |
| Stage classification |  |  |  |  |
| Stage Ⅰ+Ⅱ | 36 | 39 | 75 | 0.4321 |
| Stage Ⅲ+Ⅳ | 4 | 2 | 6 |
| Grade classification |  |  |  |  |
| G1+G2 | 30 | 27 | 57 | 0.467 |
| G3+G4 | 10 | 14 | 24 |

Supplementary Table 4. Univariate and multivariate survival analysis of ITGB7 expression and clinical characteristics of patients in TCGA PAAD.

| Characteristics | Univariate Cox | | | | Multivariate Cox | | | |
| --- | --- | --- | --- | --- | --- | --- | --- | --- |
| p-Value | Hazard Ratio | 95% CI | | p-Value | Hazard Ratio | 95% CI | |
| Lower | Upper | Lower | Upper |
| Gender | 0.714 | 1.126 | 0.598 | 2.118 | 0.959 | 0.981 | 0.479 | 2.010 |
| Age | 0.210 | 1.020 | 0.989 | 1.052 | 0.222 | 1.020 | 0.988 | 1.053 |
| T stage | 0.893 | 0.941 | 0.391 | 2.268 | 0.672 | 1.562 | 0.198 | 12.314 |
| N stage | 0. 170 | 1.684 | 0.800 | 3.547 | 0.052 | 2.727 | 0.993 | 7.489 |
| M stage | 0.735 | 0.781 | 0.187 | 3.271 | 0.279 | 18.063 | 0.096 | 3395.513 |
| Pathological Stage | 0.601 | 0.858 | 0.483 | 1.524 | 0.278 | 0.261 | 0.023 | 2.958 |
| Pathological Grade | 0. 111 | 1.413 | 0.923 | 2.163 | 0.143 | 1.397 | 0.893 | 2.186 |
| ITGB7 expression | 0.735 | 0.941 | 0.662 | 1.339 | 0.947 | 1.013 | 0.683 | 1.503 |


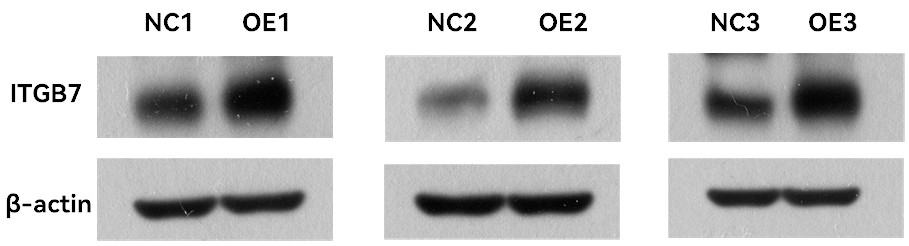
es

Supplementary Figure 1. Western blot of ITGB7 overexpressing/control PANC01 cell lines . NC,negative control. OE, over expression.


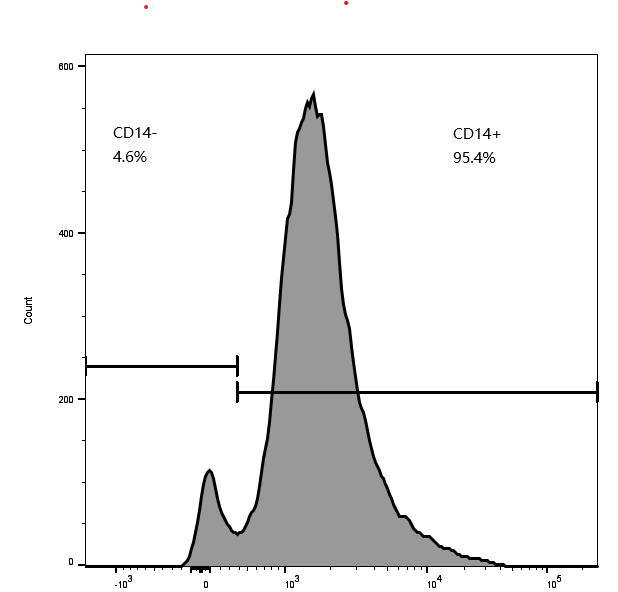


Supplementary Figure 2. The purity of CD14+ cells in peripheral blood mononuclear cells obtained by magnetic bead separation was detected by flow cytometry.


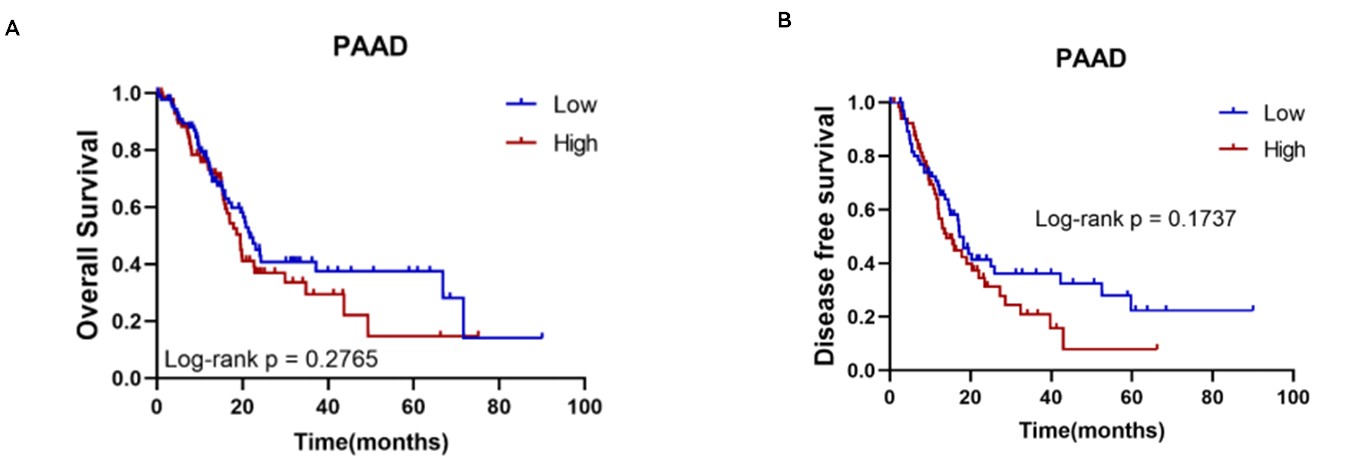


Supplementary Figure 3. A. Overall survival analysis and disease free survival analysis(B) of high and low- ITGB7 expression groups in the PAAD dataset.


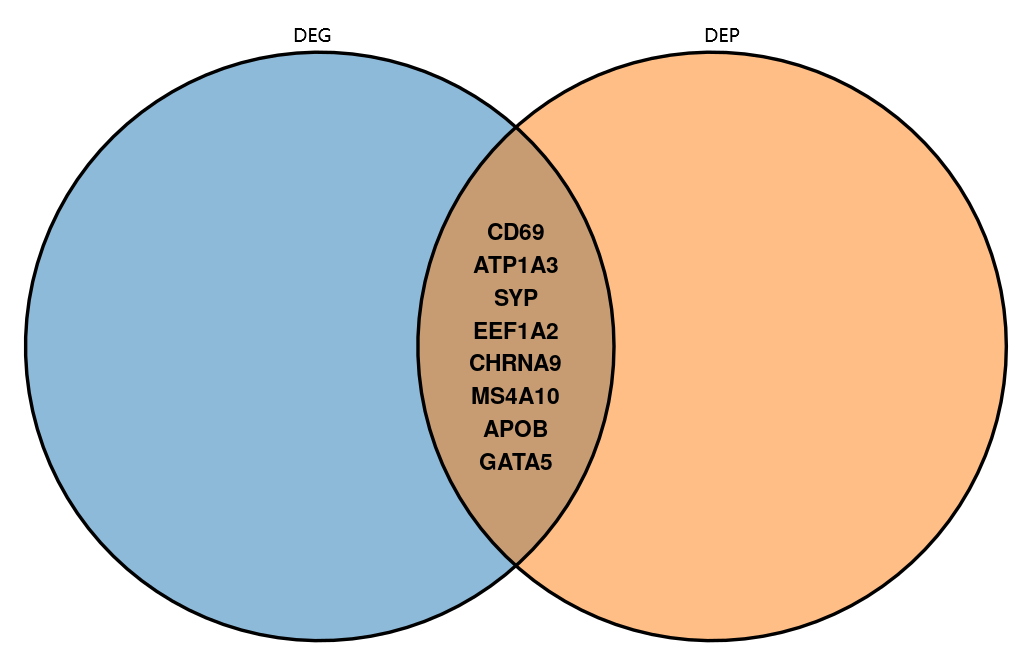


Supplementary Figure 4. The overlapping molecules between DEGs derived from TCGA data and DEPs identified in the proteomic analysis of the PANC1 cell line.


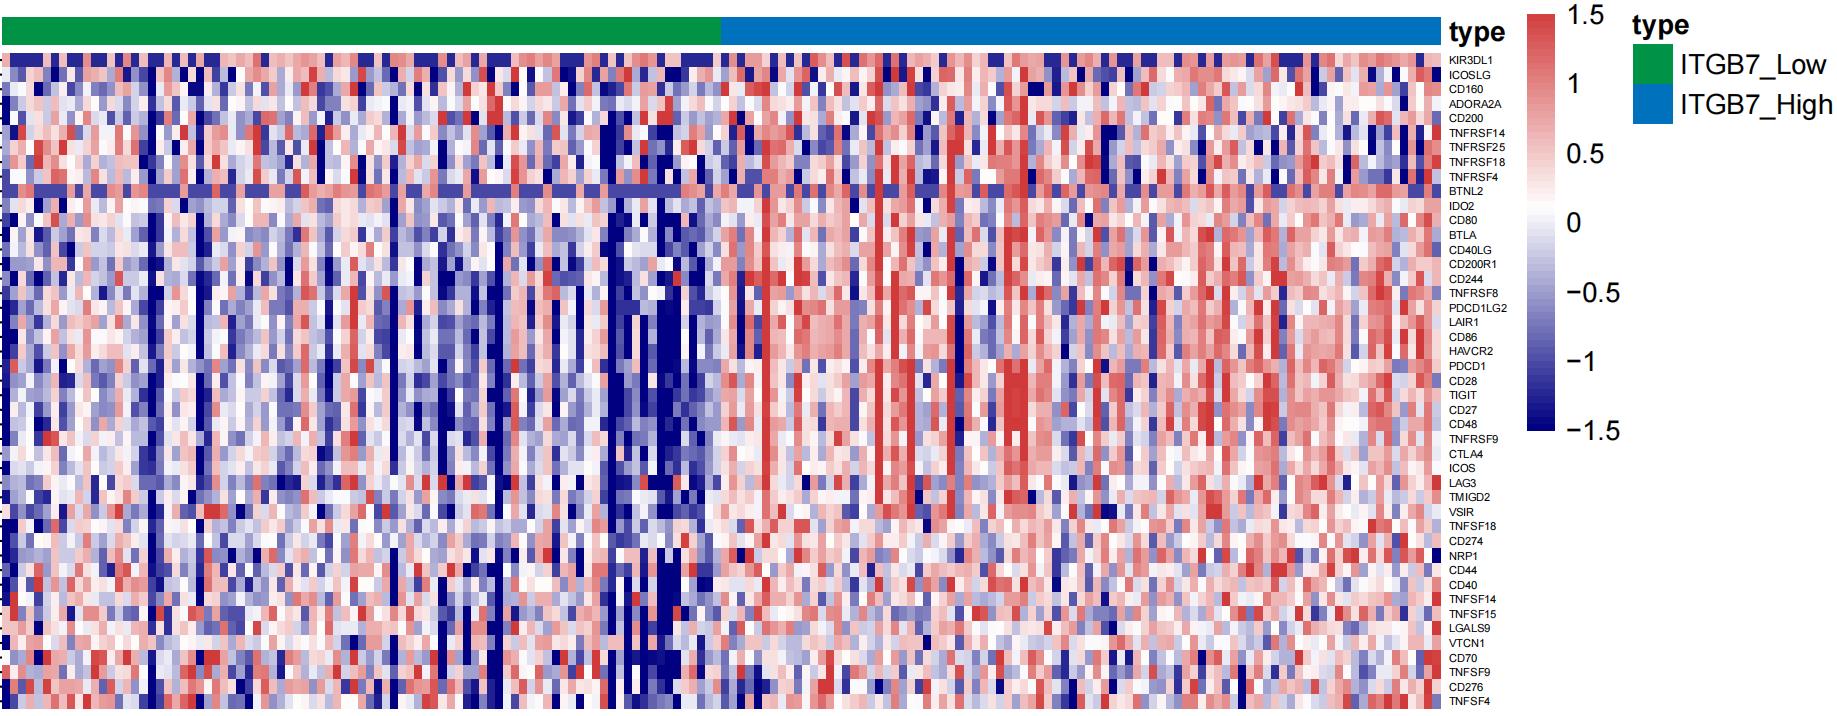


Supplementary Figure 5. Heatmap of ICM expressions in PaC patients with high and low ITGB7 expression levels.


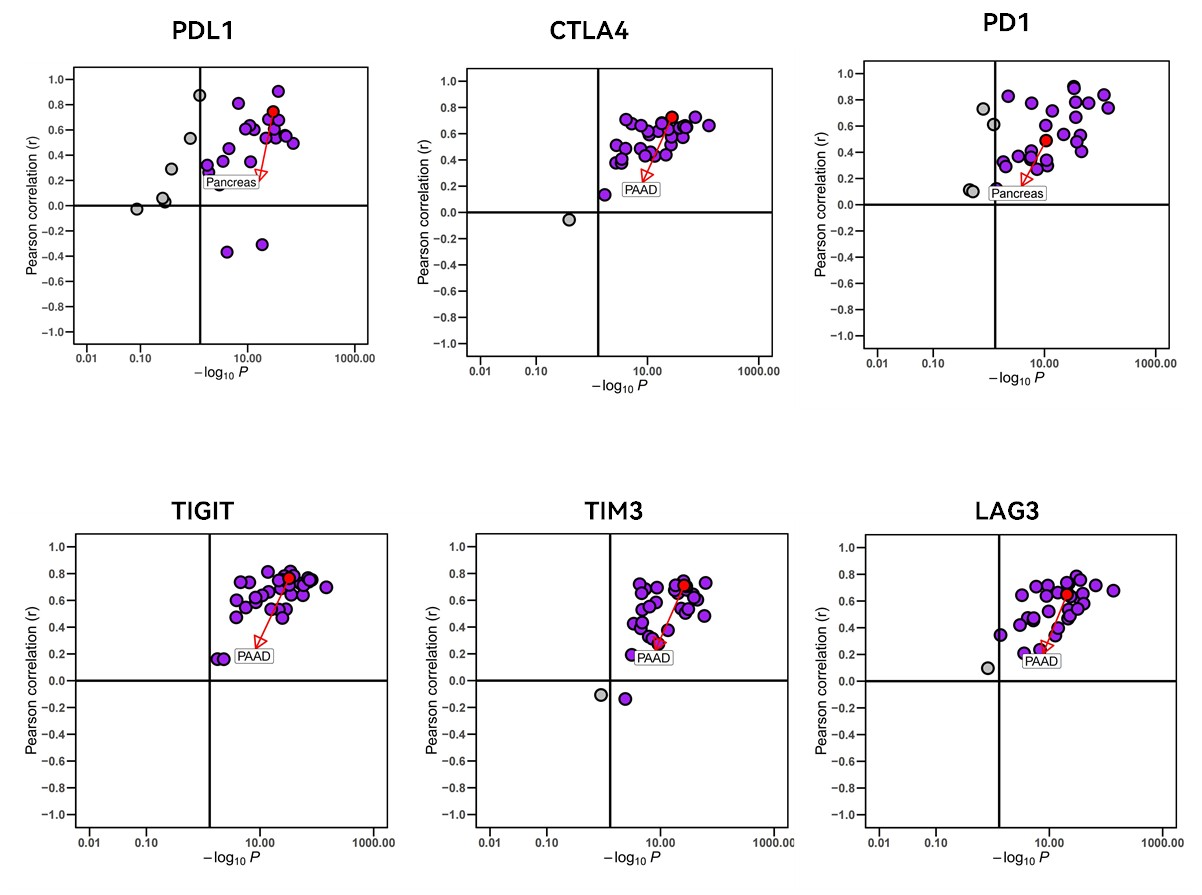


Supplementary Figure 6. Scatter plot of the correlation between ITGB7 and ICMs in normal organizations in GTEx database.

The arrow indicates pancreatic tissue. Each point represents a type of organization. Purple points indicate significant correlation differences. Gray points indicate no correlation differences. The Y-axis represents the positive or negative values of the correlation. The X-axis represents the corrected P-values.


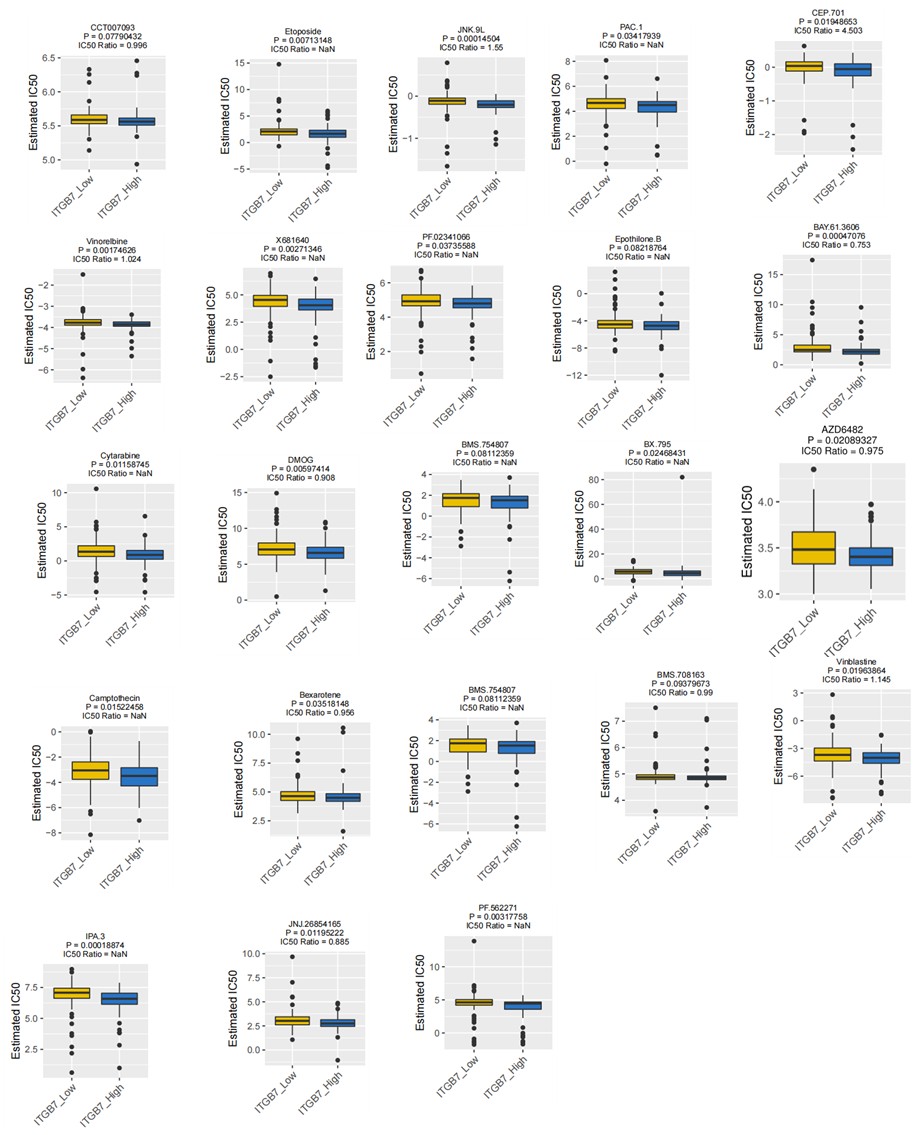


Supplementary Figure 7. Prediction of drug sensitivity in high and low ITGB7 expression groups .


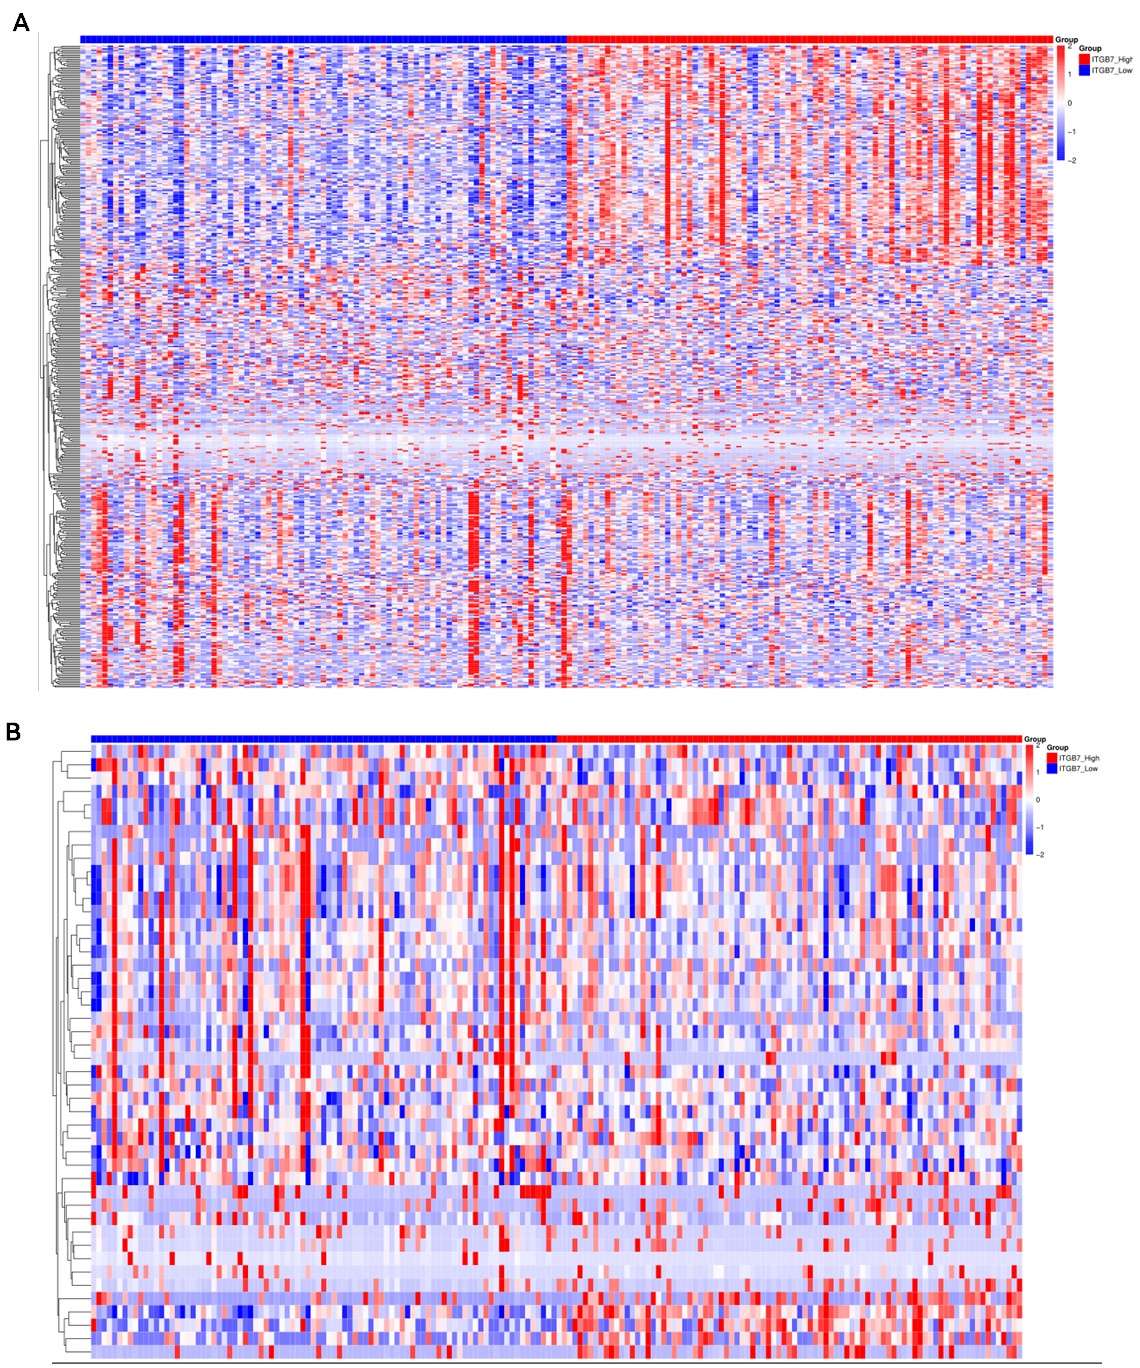


Supplementary Figure 8. Heatmap of differential analysis of lncRNAs(A) and miRNAs(B) in ITGB7 high and low expression groups.


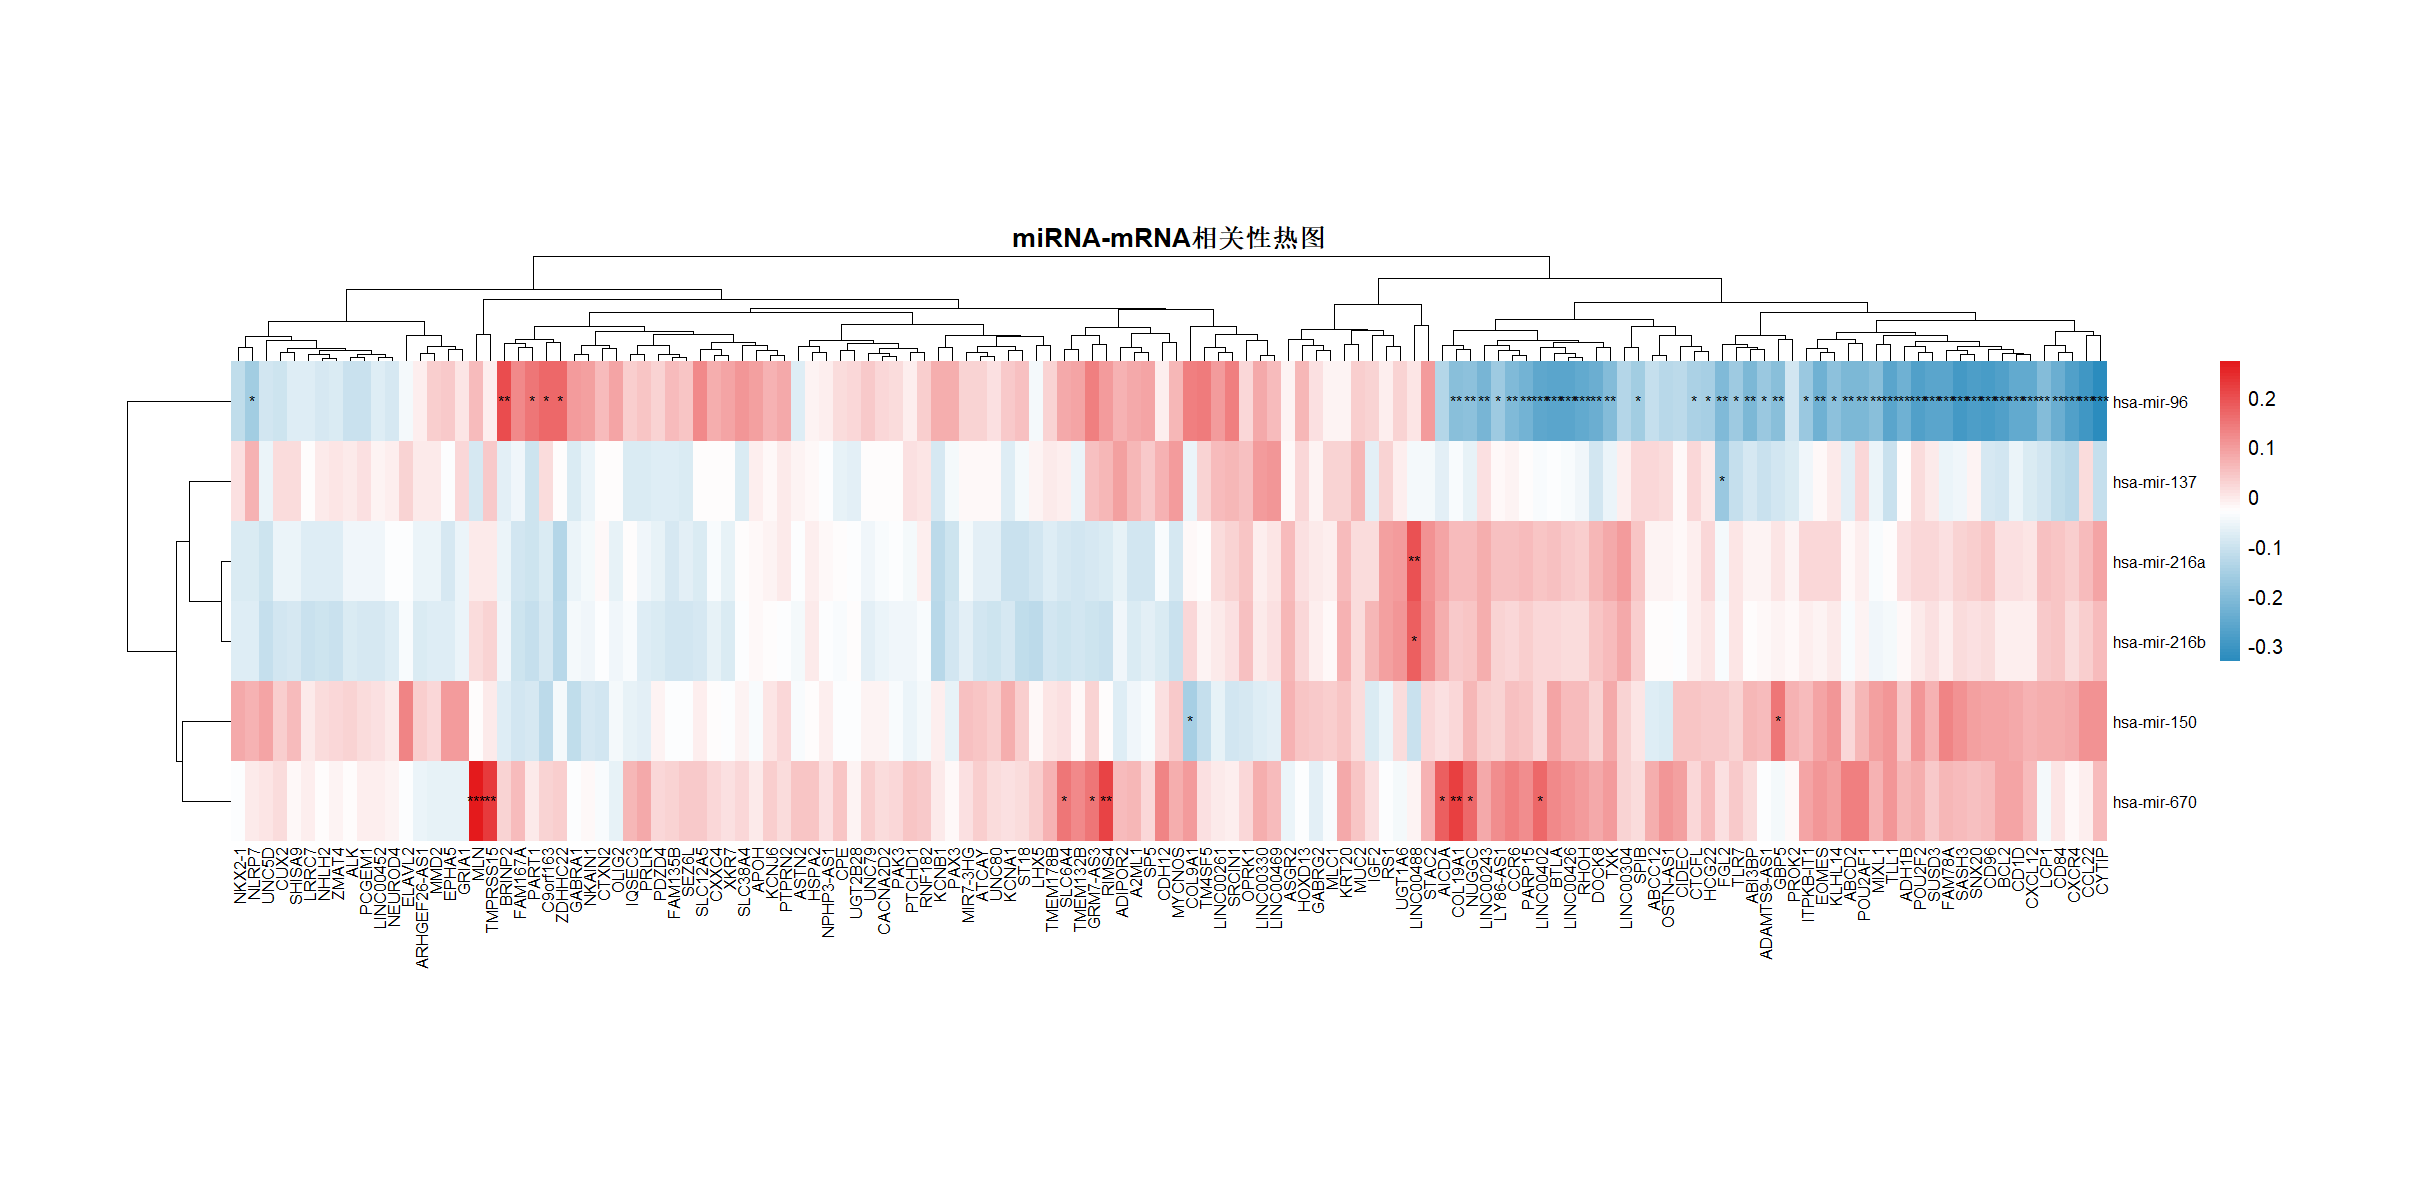


Supplementary Figure 9. Heatmap of correlation between miRNAs and mRNA/lncRNA in the ceRNA network.

Supplementary File 1. PRM validation for the quantification of twenty-six candidate proteins identified from TMT label-based LC-MS/MS analysis.

| PG.ProteinId | PG.GeneId | PG.PrecursorCount | PG.ProteinDescription |
| --- | --- | --- | --- |
| O75131 | CPNE3 | 6 | Copine-3 |
| P02730 | SLC4A1 | 5 | Band 3 anion transport protein |
| P04083 | ANXA1 | 5 | Annexin A1 |
| P05114 | HMGN1 | 1 | Non-histone chromosomal protein HMG-14 |
| P05204 | HMGN2 | 1 | Non-histone chromosomal protein HMG-17 |
| P09525 | ANXA4 | 6 | Annexin A4 |
| P15531 | NME1 | 2 | Nucleoside diphosphate kinase A |
| P16157 | ANK1 | 3 | Ankyrin-1 |
| P17096 | HMGA1 | 3 | High mobility group protein HMG-I/HMG-Y |
| P18085 | ARF4 | 2 | ADP-ribosylation factor 4 |
| P20073 | ANXA7 | 4 | Annexin A7 |
| P31949 | S100A11 | 4 | Protein S100-A11 |
| P35579 | MYH9 | 5 | Myosin-9 |
| P35610 | SOAT1 | 2 | Sterol O-acyltransferase 1 |
| P46459 | NSF | 4 | Vesicle-fusing ATPase |
| P50995 | ANXA11 | 6 | Annexin A11 |
| P68871 | HBB | 3 | Hemoglobin subunit beta |
| P69905 | HBA1 | 1 | Hemoglobin subunit alpha |
| P99999 | CYCS | 1 | Cytochrome c |
| Q13439 | GOLGA4 | 1 | Golgin subfamily A member 4 |
| Q13547 | HDAC1 | 3 | Histone deacetylase 1 |
| Q14839 | CHD4 | 3 | Chromodomain-helicase-DNA-binding protein 4 |
| Q8IVM0 | CCDC50 | 1 | Coiled-coil domain-containing protein 50 |
| Q9NVN8 | GNL3L | 2 | Guanine nucleotide-binding protein-like 3-like protein |
| Q9UHB6 | LIMA1 | 5 | LIM domain and actin-binding protein 1 |
| Q9Y5Y5 | PEX16 | 2 | Peroxisomal membrane protein PEX16 |
